# Supplementary material for: Pericoronary Adipose Tissue Radiomics from Coronary Computed Tomography Angiography Identifies Vulnerable Plaques
Source: MDPI journal article supplement (doi:10.3390/bioengineering10030360), 2023-03-14
Supplement: s1 [file s1]

**Table S1.** List of features included in the final models of identification of IVOCT-TCFA, IVOCT-MC, and IVOCT-TCFA-MC, respectively. Favorable radiomics features tended to be those describing texture and size of PCAT.

| IVOCT-TCFA                                       |                                                  |
|--------------------------------------------------|--------------------------------------------------|
| PCAT-LOI model                                   | PCAT-Vessel model                                |
| max_glszm_SizeZoneNonUniformity_bin32            | max_shape_MinorAxisLength_bin8                   |
| std_gldm_LargeDependenceEmphasis_bin8            | min_ngtdm_Coarseness_bin8                        |
| min_glszm_GrayLevelNonUniformityNormalized_bin16 | max_firstorder_Range_bin8                        |
|                                                  | max_glrlm_RunLengthNonUniformity_bin16           |
|                                                  | mean_glszm_SizeZoneNonUniformityNormalized_bin32 |
| IVOCT-MC                                         |                                                  |
| PCAT-LOI model                                   | PCAT-Vessel model                                |
| mean_ngtdm_Busyness_bin32                        | min_glszm_SizeZoneNonUniformityNormalized_bin16  |
| mean_shape_Sphericity_bin8                       | max_shape_Maximum2DDiameterSlice_bin8            |
| std_shape_Maximum2DDiameterSlice_bin8            | std_firstorder_Mean_bin8                         |
| IVOCT-TCFA-MC                                    |                                                  |
| PCAT-LOI model                                   | PCAT-Vessel model                                |
| std_gldm_DependenceNonUniformityNormalized_bin32 | max_shape_Maximum2DDiameterSlice_bin8            |
| max_glszm_SmallAreaHighGrayLevelEmphasis_bin16   | std_glrlm_LongRunHighGrayLevelEmphasis_bin8      |
| mean_glszm_SizeZoneNonUniformityNormalized_bin8  | min_gldm_LowGrayLevelEmphasis_bin8               |
|                                                  | max_shape_MinorAxisLength_bin8                   |
|                                                  | mean_ngtdm_Busyness_bin32                        |
|                                                  | max_glcm_ClusterShade_bin8                       |
|                                                  | max_glszm_SmallAreaHighGrayLevelEmphasis_bin8    |
|                                                  | std_shape_Maximum2DDiameterRow_bin8              |
